# Supplementary material for: Sphingosine-1-Phosphate Receptor Type 4 (S1P4) Is Differentially Regulated in Peritoneal B1 B Cells upon TLR4 Stimulation and Facilitates the Egress of Peritoneal B1a B Cells and Subsequent Accumulation of Splenic IRA B Cells under Inflammatory Conditions
Source: PubMed Central journal article supplement (PMC8037865; doi:10.3390/ijms22073465), 2021-03-27
Supplement: ijms-22-03465-s001.pdf [file ijms-22-03465-s001.pdf]

**Supplementary Material to „Spingosine-1-phosphate receptor type 4 (S1P<sub>4</sub>) is differentially regulated on peritoneal B1 cells upon TLR4 stimulation and facilitates egress of peritoneal B1a cells and subsequent accumulation of splenic IRA B cells under abdominal inflammatory conditions“**

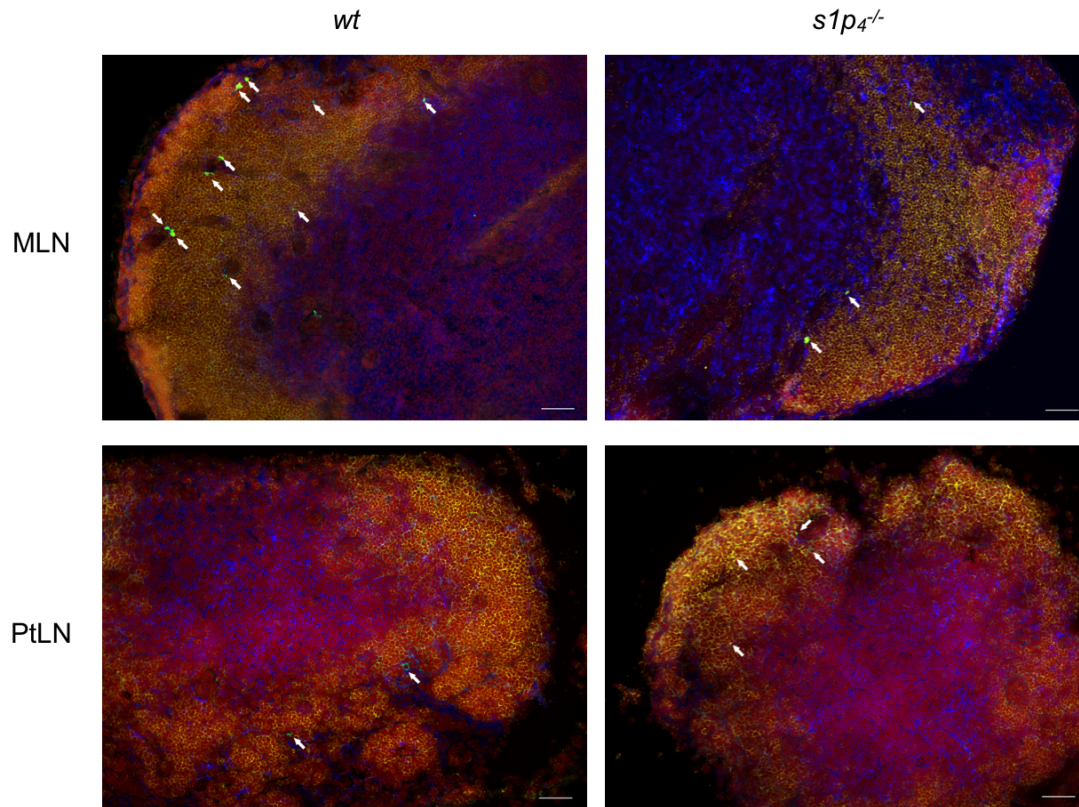

**Supplementary Figure 1. Distribution of labeled peritoneal B cells in lymph nodes after adoptive peritoneal transfer and repeated LPS-stimulation.**

72 hours after adoptive transfer of labelled peritoneal cells and repeated LPS pulses, the mesenteric (MLN), and parathyroid (PtLN) lymph nodes were harvested. Sections (3  $\mu\text{m}$ ) were stained with anti-B220 (yellow), anti-CD4 (blue), anti-CFSE (green) and Draq5 (red). Labeled B cells were identified as CFSE<sup>+</sup> B220<sup>+</sup> (white arrows). Representative images for 5 mice per group are shown (white bar equals 50  $\mu\text{m}$ ).

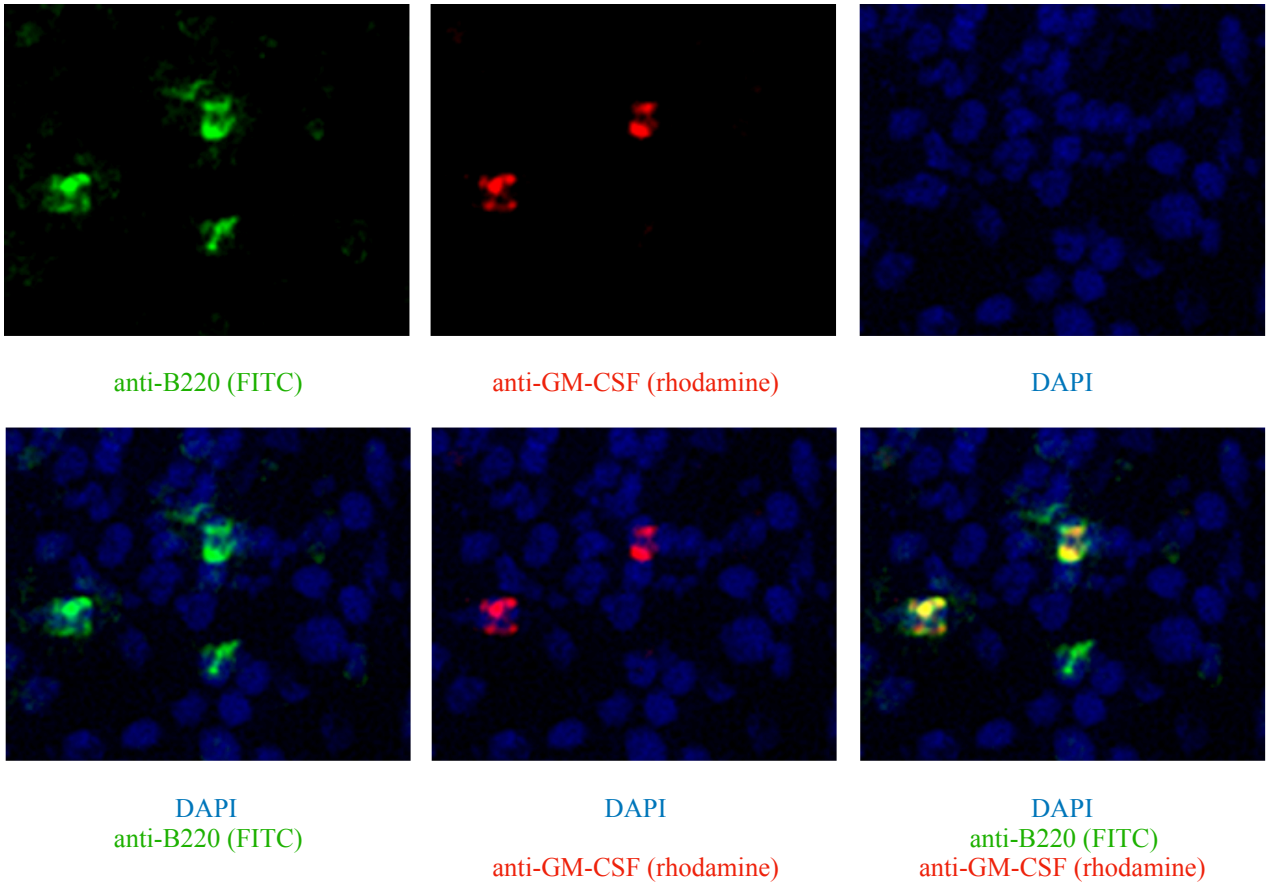

**Supplementary Figure 2. Identification of splenic innate response activator (IRA) B cells by immunohistochemistry.**

7 days after induction of abdominal sepsis by *colon ascendens stent peritonitis* (CASP), the spleens of the mice were harvested. Sections (3  $\mu\text{m}$ ) were stained with anti-B220 (green), anti-GM-CSF (red) and DAPI (blue). IRA B cells were identified as B220<sup>+</sup> GM-CSF<sup>+</sup> cells.

**Supplementary Table 1: Cytokine quantification in plasma, peritoneal lavage fluid and spleen after CASP induction in wt and *s1pr4*<sup>-/-</sup> mice**

| Plasma   | <i>wt</i> |       | <i>s1pr4</i> <sup>-/-</sup> |       | p-val  |     |
|----------|-----------|-------|-----------------------------|-------|--------|-----|
|          | Median    | Range | Median                      | Range |        |     |
| IL-1β    | 2807      | 964,1 | 37,75                       | 749,1 | 0,0732 | ns  |
| IL-2     | 11,75     | 2,062 | 16,13                       | 8,141 | 0,1714 | ns  |
| IL-3     | 909,8     | 138   | 1033                        | 145,5 | 0,5458 | ns  |
| IL-6     | 85,2      | 100,5 | 2182                        | 4149  | 0,0427 | *   |
| IL-10    | 36,32     | 59,08 | 1353                        | 3222  | 0,0006 | *** |
| IL-12p70 | n.d.      |       | n.d.                        |       |        |     |
| IL-17A   | n.d.      |       | n.d.                        |       |        |     |
| CXCL13   | 24996     | 1221  | 19850                       | 2864  | 0,2718 | ns  |
| GM-CSF   | 59,61     | 20,83 | 61,99                       | 60,8  | 0,873  | ns  |
| IFN-γ    | n.d.      |       | n.d.                        |       |        |     |
| MCP-1    | 43,65     | 24,03 | 538,1                       | 2891  | 0,2817 | ns  |
| TGF-β    | n.d.      |       | n.d.                        |       |        |     |
| TNF-α    | 11,14     | 6,064 | 35,98                       | 46,82 | 0,0952 | ns  |

| Lavage   | <i>wt</i> |       | <i>s1pr4</i> <sup>-/-</sup> |       | p-val  |    |
|----------|-----------|-------|-----------------------------|-------|--------|----|
|          | Median    | Range | Median                      | Range |        |    |
| IL-1β    | 42,03     | 35,56 | 44,38                       | 24,99 | 0,7164 | ns |
| IL-2     | 20,74     | 4,578 | 16,71                       | 7,047 | 0,832  | ns |
| IL-3     | 955,5     | 266,9 | 211,6                       | 97,59 | 0,0977 | ns |
| IL-6     | 1442      | 1181  | 3369                        | 2000  | 0,1884 | ns |
| IL-10    | 49,37     | 52,36 | 1037                        | 277,7 | 0,0068 | ** |
| IL-12p70 | 8,07      | 1,025 | 7,28                        | 2,385 | 0,5667 | ns |
| IL-17A   | 5,57      | 4,043 | 80,76                       | 58,04 | 0,0734 | ns |
| CXCL13   | 3908      | 1918  | 1647                        | 1383  | 0,1725 | ns |
| GM-CSF   | 94,91     | 13,94 | 39,08                       | 23,85 | 0,2967 | ns |
| IFN-γ    | 7,19      | 1,81  | 9,42                        | 5,212 | 0,5253 | ns |
| MCP-1    | 77,71     | 191,9 | 311,1                       | 518,6 | 0,0943 | ns |
| TGF-β    | 21,04     | 3,94  | 22,39                       | 8,847 | 0,9999 | ns |
| TNF-α    | 23,57     | 2,863 | 30,96                       | 7,228 | 0,4394 | ns |

| Spleen   | <i>wt</i> |       | <i>s1pr4</i> <sup>-/-</sup> |       | p-val  |    |
|----------|-----------|-------|-----------------------------|-------|--------|----|
|          | Median    | Range | Median                      | Range |        |    |
| IL-1β    | 28,54     | 151   | 39,07                       | 156,8 | 0,8507 | ns |
| IL-2     | 36,3      | 9,967 | 36,8                        | 9,677 | 0,885  | ns |
| IL-3     | 659,6     | 63,37 | 667,7                       | 79,65 | 0,536  | ns |
| IL-6     | 14,6      | 5,221 | 113,7                       | 395,3 | 0,1025 | ns |
| IL-10    | 25,59     | 25,32 | 125,7                       | 171   | 0,1296 | ns |
| IL-12p70 | n.d.      |       | n.d.                        |       |        |    |
| IL-17A   | n.d.      |       | n.d.                        |       |        |    |
| CXCL13   | 5068      | 1358  | 3435                        | 1462  | 0,2423 | ns |
| GM-CSF   | 48,89     | 35,8  | 22,49                       | 27,2  | 0,373  | ns |
| IFN-γ    | 13,14     | 3,055 | 26,28                       | 20,25 | 0,3517 | ns |
| MCP-1    | 10,15     | 4,931 | 69                          | 46,81 | 0,1128 | ns |
| TGF-β    | 374,4     | 51,93 | 277,7                       | 85,2  | 0,8244 | ns |
| TNF-α    | 9,845     | 9,723 | 37,22                       | 9,836 | 0,2    | ns |

n.d. = non-detectable

**Supplementary Table 2: List of antibodies used.**

| Name                       | Isotype              | Clone     | Concentration | Dilution | Manufacturer                                   |
|----------------------------|----------------------|-----------|---------------|----------|------------------------------------------------|
| anti-CD11b-APC eFluor 780  | Rat IgG2b, $\kappa$  | M1/70     | 0,2 mg/ml     | 1:1000   | eBioscience (Affymetrix), Santa Clara, CA, USA |
| anti-CD19-eFluor 660       | Rat IgG2a, $\lambda$ | 93        | 0,5 mg/ml     | 1:500    | BioLegend, San Diego, CA, USA                  |
| anti-CD23-Biotin           | Rat IgG2a, $\kappa$  | B3B4      | 0,5 mg/ml     | 1:100    | BioLegend, San Diego, CA, USA                  |
| anti-CD23-PE               | Rat IgG2a, $\kappa$  | eBio1D3   | 0,2 mg/ml     | 1:200    | eBioscience, Santa Clara, CA, USA              |
| anti-CD3-FITC              | Armenian Hamster IgG | 145-2C11  | 0,5 mg/ml     | 1:100    | eBioscience, Santa Clara, CA, USA              |
| anti-CD3-BV605             | Armenian Hamster IgG | 145-2C11  | 0,2 mg/ml     | 1:100    | BioLegend, San Diego, CA, USA                  |
| anti-CD4-BV421             | Rat IgG2b, $\kappa$  | GK1.5     | 25 $\mu$ g/ml | 1:40     | BioLegend, San Diego, CA, USA                  |
| anti-CD45R (B220)-Alexa647 | Rat IgG2a, $\kappa$  | RA3-6B2   | 0,5 mg/ml     | 1:20     | Miltenyi Biotec, Bergisch Gladbach, DE         |
| anti-CD45R (B220)-Biotin   | Rat IgG2a, $\kappa$  | RA3-6B2   | 0,5 mg/ml     | 1:20     | Miltenyi Biotec, Bergisch Gladbach, DE         |
| anti-CD45R (B220)-FITC     | Rat IgG2a, $\kappa$  | RA3-6B2   | 0,15 mg/ml    | 1:20     | Miltenyi Biotec, Bergisch Gladbach, DE         |
| anti-CD5-PE/Cy7            | Rat IgG2a, $\kappa$  | 53-7.3    | 0,2 mg/ml     | 1:200    | BioLegend, San Diego, CA, USA                  |
| anti-FITC-Alexa488         | Rabbit IgG Fraction  | A11090    | 1 mg/ml       | 1:100    | life technologies, Carlsbad, CA, USA           |
| anti-GL7-Biotin            | Rat IgG2a, $\kappa$  | GL-7      | 0,5 mg/ml     | 1:50     | eBioscience, Santa Clara, CA, USA              |
| anti-GM-CSF-Biotin         | Rat IgG2a, $\kappa$  | 554407    | 0,5 mg/ml     | 1:100    | BD Biosciences, San Jose, CA, USA              |
| anti-IgA-BV421             | Rat IgG2a, $\kappa$  | C10-1     | 0,2 mg/ml     | 1:100    | BD Biosciences, San Jose, CA, USA              |
| anti-IgD-V450              | Rat IgG2a, $\kappa$  | 11-26c.2a | 0,2 mg/ml     | 1:100    | BD Biosciences, San Jose, CA, USA              |

| Name                                          | Isotype              | Clone    | Concentration | Dilution | Manufacturer                                                  |
|-----------------------------------------------|----------------------|----------|---------------|----------|---------------------------------------------------------------|
| anti-IgD-Biotin                               | Rat IgG2a, $\kappa$  | MD78Z    | 0,5 mg/ml     | 1:100    | Southern Biotech, Birmingham, AL, USA                         |
| anti-IgM-BV650                                | Rat IgG2a, $\kappa$  | R6-60.2  | 0,2 mg/ml     | 1:100    | BD Biosciences, San Jose, CA, USA                             |
| anti-IgM-FITC                                 | Rat IgG2a, $\kappa$  | II/41    | 0,5 mg/ml     | 1:100    | Invitrogen, Carlsbad, CA, USA                                 |
| anti-IgM-Biotin                               | Rat IgG2a, $\kappa$  | RTK2118  | 0,5 mg/ml     | 1:100    | BioLegend, San Diego, CA, USA                                 |
| anti-MAdCAM-1 Alexa488                        | Rat IgG2a, $\kappa$  | MECA-367 | 0,5 mg/ml     | 1:50     | BioLegend, San Diego, CA, USA                                 |
| anti-Rb-IgG-BV421                             | Donkey IgG           | Poly4064 | 0,1 mg/ml     | 1:50     | BioLegend, San Diego, CA, USA                                 |
| anti-Rb-IgG-FITC                              | Goat IgG             | ab6717   | 2 mg/ml       | 1:100    | Abcam, Cambridge, UK                                          |
| Fc-Block (TrueStain FcX <sup>®</sup> CD16/32) | Rat IgG2a, $\lambda$ | 93       | 0,5 mg/ml     | 1:100    | BioLegend, San Diego, CA, USA                                 |
| IgG-Alexa488 (Isotype control)                | Rat IgG2a, $\kappa$  | eBR2a    | 0,5 mg/ml     | 1:100    | eBioscience, Santa Clara, CA, USA                             |
| IgG-APC (Isotype control)                     | Rat IgG2a, $\kappa$  | eBR2a    | 0,2 mg/ml     | 1:250    | eBioscience, Santa Clara, CA, USA                             |
| IgG-Biotin (Isotype control)                  | Rat IgG2a, $\kappa$  | eBR2a    | 0,5 mg/ml     | 1:100    | eBioscience, Santa Clara, CA, USA                             |
| IgG-BV421 (Isotype control)                   | Rat IgG2a, $\kappa$  | MOPC-173 | 0,5 mg/ml     | 1:100    | BioLegend, San Diego, CA, USA                                 |
| DAPI                                          |                      |          |               | 1:1000   | Molecular Probes, Eugene, OR, USA                             |
| Draq5 <sup>™</sup>                            |                      |          |               | 1:500    | BioLegend, San Diego, CA, USA                                 |
| Fluorescein-labeled PNA                       |                      |          |               | 1:500    | Vector Laboratories, Burlingame, CA, USA                      |
| Rhodamine (TRITC)-conjugated Streptavidin     |                      |          |               | 1:500    | Jackson ImmunoResearch Laboratories Inc., West Grove, PA, USA |

**Supplementary Table 3:** Primer sequences used for quantification of Sphingosine-1-phosphate (S1P) receptor subtypes and  $\beta_2$ -microglobulin.

| <b>Primer</b>                    | <b>Sequence</b>                   |
|----------------------------------|-----------------------------------|
| S1P <sub>1</sub> forward         | 5'-AAC TTT GCG AGT GAG CTG GT-3'  |
| S1P <sub>1</sub> reverse         | 5'-CTA GAG GGC GAG GTT GAG TG-3'  |
| S1P <sub>2</sub> forward         | 5'-AAC TCC GGG ACA TAG ACC GA-3'  |
| S1P <sub>2</sub> reverse         | 5'-GGC TGA GCA CTG GCT AGG-3'     |
| S1P <sub>3</sub> forward         | 5'-GCC CCT AGA CGG GAG TCT TA-3'  |
| S1P <sub>3</sub> reverse         | 5'-ATA GGC TCT CGT TCT GCA AAG-3' |
| S1P <sub>4</sub> forward         | 5'-GGA CTT CTC GGT CAC TCA GC-3'  |
| S1P <sub>4</sub> reverse         | 5'-GGC TTG CTG TCA TGT TCT CA-3'  |
| S1P <sub>5</sub> forward         | 5'-GGA GGG ACT CTC CTG GAT TC-3'  |
| S1P <sub>5</sub> reverse         | 5'-TTC CTC TGT AGC CAG CCA CT-3'  |
| $\beta_2$ -microglobulin forward | 5'-ATT CAC CCC CAC TGA GAC TG-3'  |
| $\beta_2$ -microglobulin reverse | 5'-GCT ATT TCT TTC TGC GTG CAT-3' |
